# Supplementary material for: Alteration of carbon, nitrogen, and phosphorus stoichiometry andtheir related enzymes as affected by increased soil coarseness
Source: Copernicus journal article supplement (doi:10.5194/bg-2016-483), 2016-11-10
Supplement: Supplementary file [file bg-2016-483-AC3-supplement.pdf]

The current work is interesting. The authors should consider few issues to improve the manuscript:

1) The authors should take into consideration about absorption/inhibition of enzymatic activity by clay particles.

Response: Thanks so much for the observation. This has been mentioned in Page 17 Line 7-8.

2) The authors focus on organic carbon and dissolved organic carbon. But, what about humic substance?

Response: We expect that humic substance would also decrease with increasing soil coarseness intensity. This is because microbial activity decreased with soil coarseness which would slow down humification process. In our future work, we will analyze how humic substance change with soil coarseness.
